# Supplementary material
Source: MDPI journal article supplement (https://www.mdpi.com/2311-7524/8/4/317)
Supplement: s1 [file s1]

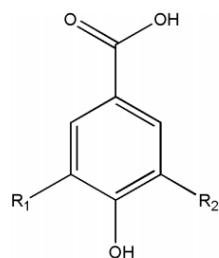

| No. | Compound                               | R <sub>1</sub> | R <sub>2</sub> |
|-----|----------------------------------------|----------------|----------------|
| 1   | 3,4,5-Trihydroxybenzoic acid           | OH             | OH             |
| 2   | Galic acid 3-O-β-glucoside             | Glc            | OH             |
| 3   | Protocatecheuic acid 3-O-β-D-glucoside | Glc            | H              |
| 4   | 3,4-Dihydroxybenzoic acid              | OH             | H              |

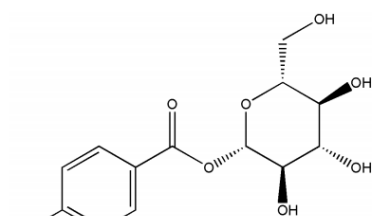

5 4-Hydroxybenzoic acid β-D-glucosyl ester

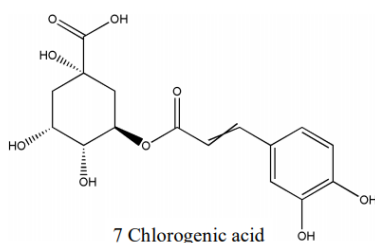

7 Chlorogenic acid

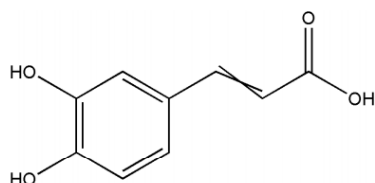

9 Caffeic acid

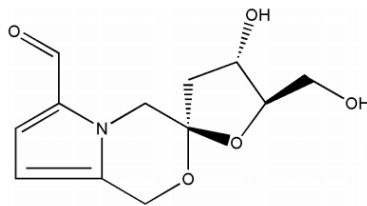

10 Acortatarine A

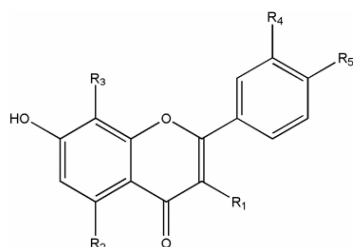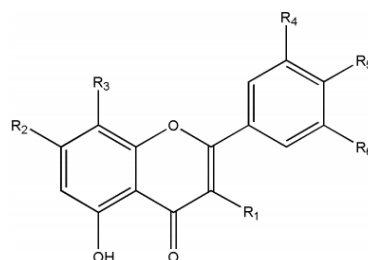

| No. | Compound                                                                                 | R <sub>1</sub> | R <sub>2</sub> | R <sub>3</sub> | R <sub>4</sub> | R <sub>5</sub> | R <sub>6</sub> |
|-----|------------------------------------------------------------------------------------------|----------------|----------------|----------------|----------------|----------------|----------------|
| 6   | Hibiscetin-3-O-glucoside                                                                 | Glc            | OH             | OH             | OH             | OH             | OH             |
| 8   | Floramanside B                                                                           | OH             | OH             | OH             | Glc            | OH             | OH             |
| 12  | Gossypetin 3-O-β-glucopyranoside-8-O-β-glucuronopyranoside                               | Glc            | OH             | Glu            | OH             | OH             | H              |
| 13  | Gossypetin 3-O-β-glucuronopyranoside-8-O-β-glucopyranoside                               | Glu            | OH             | Glc            | OH             | OH             | H              |
| 14  | Floramanside A                                                                           | Xyl→Gal        | OH             | H              | OH             | OH             | OH             |
| 15  | Myricetin 7-O-β-D-galactopyranoside                                                      | OH             | Gal            | H              | OH             | OH             | OH             |
| 16  | Myricetin 3-O-β-D-xylopyranosyl-(1→2)-β-D-glucopyranoside                                | Xyl→Glc        | OH             | H              | OH             | OH             | OH             |
| 17  | quercetin 3-O [β-D-xylopyranosyl (1→2) -α-L-rhamnopyranosyl (1→6) -β-D-galactopyranoside | Xyl→Rha→Gal    | OH             | H              | OH             | OH             | H              |
| 18  | Myricetin 3-O-β-D-galactopyranoside                                                      | Gal            | OH             | H              | OH             | OH             | OH             |
| 19  | Myricetin 3-robinobioside                                                                | Rha→Gal        | OH             | H              | OH             | OH             | OH             |
| 20  | Myricetin 3-O-β-D-glucopyranoside                                                        | Glc            | OH             | H              | OH             | OH             | OH             |
| 21  | Myricetin 3-O-rutinoside                                                                 | Rha→Glc        | OH             | H              | OH             | OH             | OH             |
| 23  | Quercetin 3-O-β-D-xylopyranosyl-(1→2)-O-β-D-galactopyranoside                            | Xyl→Gal        | OH             | H              | OH             | OH             | H              |
| 24  | Quercetin 3-O-β-D-xylopyranosyl-(1→2)-β-D-glucopyranoside                                | Xyl→Glc        | OH             | H              | OH             | OH             | H              |
| 25  | Gossypetin 3-O-β-D-glucopyranoside                                                       | Glc            | OH             | OH             | OH             | OH             | H              |
| 26  | Myricetin 3-O-(6-O-acetyl-β-D-galactopyranoside)                                         | 6"-Acetyl Gal  | OH             | H              | OH             | OH             | OH             |
| 27  | Quercetin 7-O-β-D-glucopyranoside                                                        | OH             | Glc            | H              | OH             | OH             | H              |
| 28  | Floramanside C                                                                           | OH             | OH             | Glu            | OH             | OH             | OH             |
| 29  | Quercetin 3-O-β-D-robinobioside                                                          | Rha→Gal        | OH             | H              | OH             | OH             | H              |

| No. | Compound                                                                              | R <sub>1</sub> | R <sub>2</sub>   | R <sub>3</sub> | R <sub>4</sub> | R <sub>5</sub>   |
|-----|---------------------------------------------------------------------------------------|----------------|------------------|----------------|----------------|------------------|
| 22  | Floramanside D                                                                        | Rha→Gal        | OCH <sub>3</sub> | H              | OH             | OH               |
| 34  | 4'-Methoxyl-5,7-dihydroxyl flavone-[-O-β-D-xylopyranosyl-(1→3)]-O-β-D-glucopyranoside | H              | OH               | Xyl→Glc        | H              | OCH <sub>3</sub> |

|     |                                                                 | 11 Dihydromyricetin          |                |                 |                |                |                |
|-----|-----------------------------------------------------------------|------------------------------|----------------|-----------------|----------------|----------------|----------------|
| No. | Compound                                                        | R <sub>1</sub>               | R <sub>2</sub> | R <sub>3</sub>  | R <sub>4</sub> | R <sub>5</sub> | R <sub>6</sub> |
| 30  | Hyperin                                                         | Gal                          | OH             | H               | OH             | OH             | H              |
| 31  | Rutin                                                           | Rha→Glc                      | OH             | H               | OH             | OH             | H              |
| 32  | Isoquercitrin                                                   | Glc                          | OH             | H               | OH             | OH             | H              |
| 33  | Myricetin 3'-O-β-D-glucopyranoside                              | OH                           | OH             | H               | Glc            | OH             | OH             |
| 35  | 6"-Acetylhyperin                                                | 6"-Acetyl Gal                | OH             | H               | OH             | OH             | H              |
| 36  | kaempferol 3-O-β-D-glucoside                                    | Glc                          | OH             | H               | H              | OH             | H              |
| 37  | 7-O-Acetyl Isoquercitrin                                        | Glc                          | Acetyl         | H               | OH             | OH             | H              |
| 38  | Myricetin 3'-O-(6-O-acetyl-β-D-glucopyranoside)                 | OH                           | OH             | H               | 6"-Acetyl Glc  | OH             | OH             |
| 39  | Gossypetin 8-O-β-D-glucuronide                                  | OH                           | OH             | Glu             | OH             | OH             | H              |
| 40  | Gossypetin                                                      | OH                           | OH             | OH              | OH             | OH             | H              |
| 41  | Myricetin                                                       | OH                           | OH             | H               | OH             | OH             | OH             |
| 42  | Quercetin 3-O-(6-O-acetyl-β-D-glucopyranoside)                  | 6"-Acetyl Glc                | OH             | H               | OH             | OH             | H              |
| 43  | Gossypetin 3'-O-glucoside                                       | OH                           | OH             | OH              | Glc            | OH             | H              |
| 44  | Floramarside F                                                  | OH                           | OH             | Glu ethyl ester | OH             | OH             | H              |
| 45  | Quercetin 3-O-α-L-rhamnopyranoside                              | Rha                          | OH             | H               | OH             | OH             | H              |
| 46  | Quercetin 3'-O-β-D-glucoside                                    | OH                           | OH             | H               | Glc            | OH             | H              |
| 47  | Quercetin 3'-O-β-glucuronide                                    | OH                           | OH             | H               | Glu            | OH             | H              |
| 48  | Floramarside E                                                  | OH                           | OH             | H               | 6"-Acetyl Glc  | OH             | H              |
| 49  | Quercetin                                                       | OH                           | OH             | H               | OH             | OH             | H              |
| 50  | Tiliroside                                                      | 6"-p-coumaroyl Glc           | OH             | H               | H              | OH             | H              |
| 51  | 3-O-kaempferol-3-O-acetyl-6-O-(p-coumaroyl)-β-D-glucopyranoside | 3"-Acetyl-6"-p-coumaroyl Glc | OH             | H               | H              | OH             | H              |

**Figure S1.** Chemical structures of constituents identified in medicinal and non-medicinal parts of *Flos Abelmoschus manihot*.

Note: "Glc", glucose; "Glu", glucuronic acid; "Gal", galactose; "Xyl", xylose; "Rha", rhamnose.
